# Supplementary material
Source: PubMed Central journal article supplement (PMC4793572)

Appendix 1: Supplementary figures [posted as supplied by author]

Fig A Protection by BCG vaccination against *Mycobacterium tuberculosis* infection(abbreviated as TB) in children as determined by **Interferon  $\gamma$  release assay** by latitude of study location (20<sup>o</sup> bands),ordered by year of study start. (D+L: DerSimonian and Laird method; M-H: Mantel-Haenszel method)

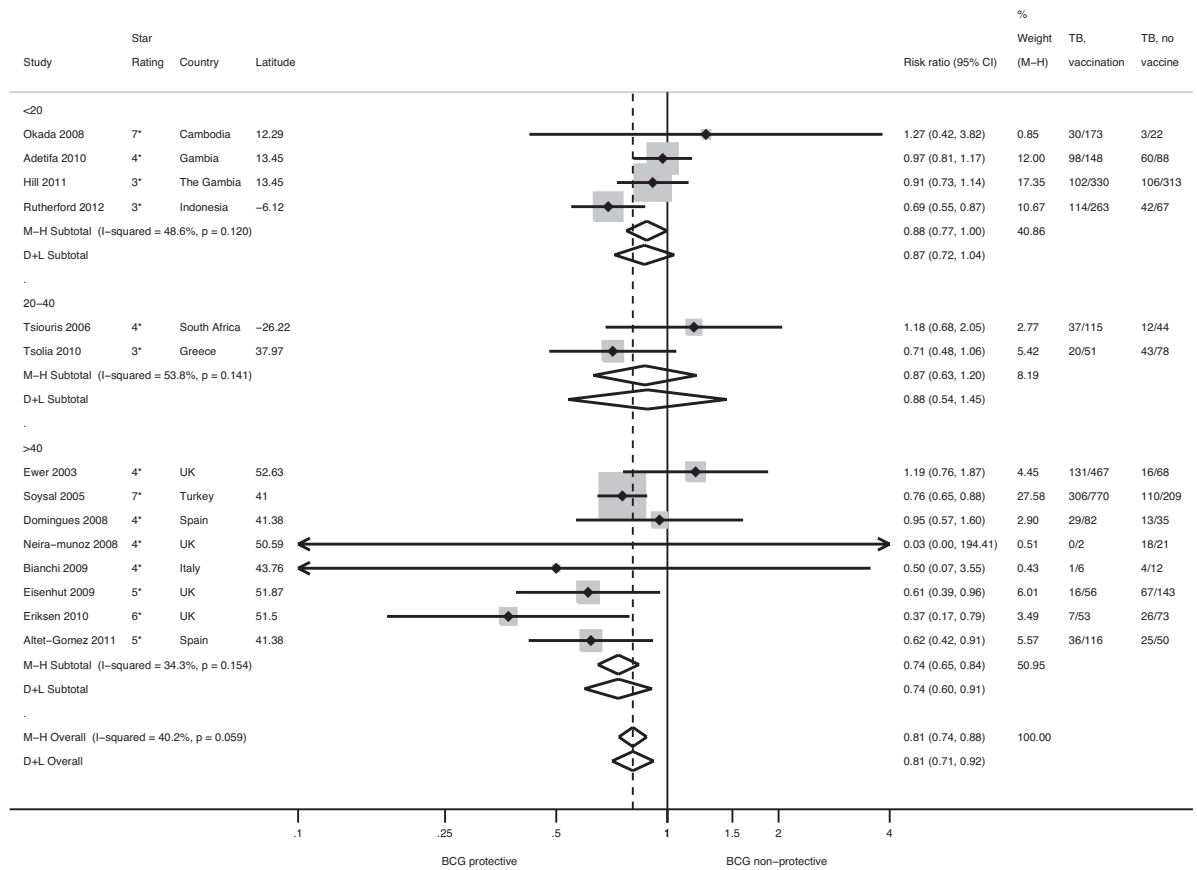

Fig B Protection by BCG vaccination against *Mycobacterium tuberculosis* infection (abbreviated as TB) in children as determined by **Interferon  $\gamma$  release assay** by national BCG vaccination policy of 'vaccination at birth' and 'not vaccinated at birth' in country of study) (D+L: DerSimonian and Laird method; M-H: Mantel-Haenszel method)

A: Population where the policy is to vaccinate at birth ;

B: Population where the policy is to not vaccinate at birth

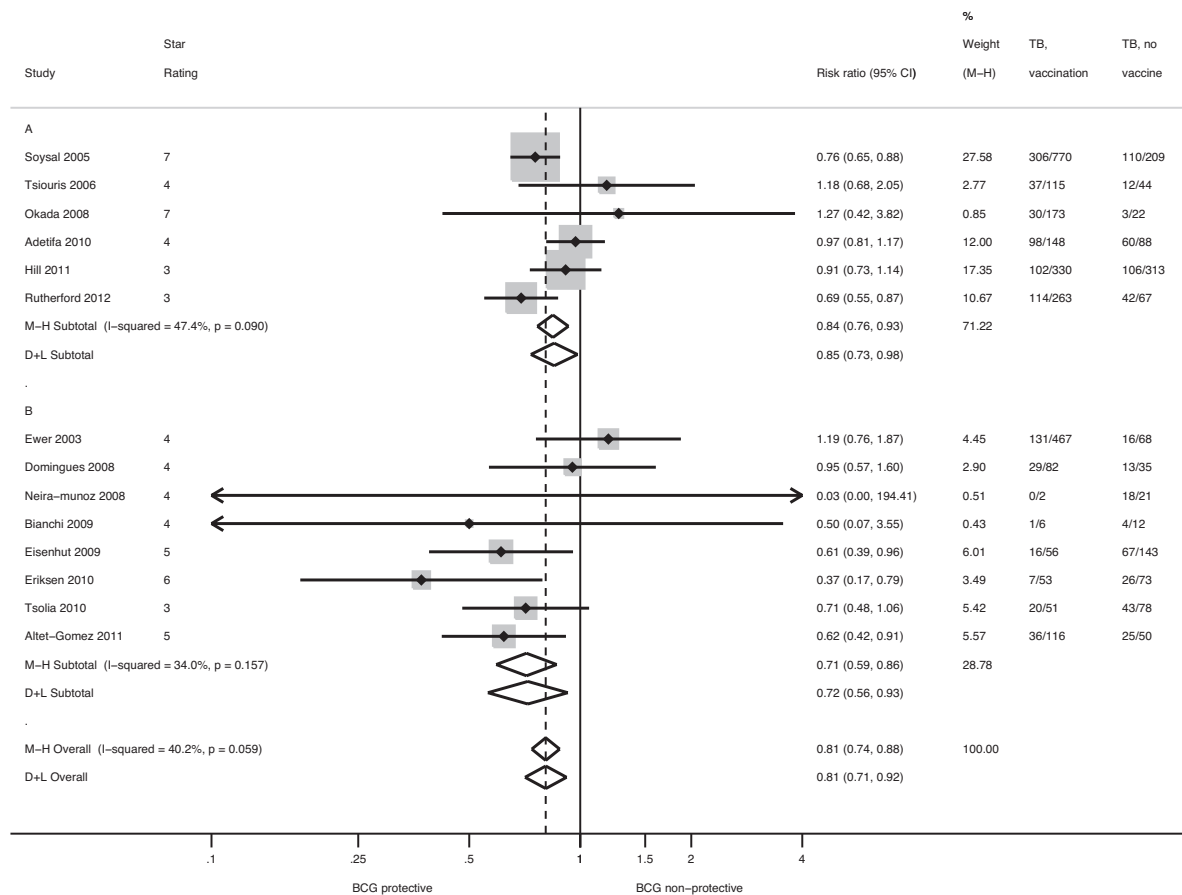

Fig C Protection by BCG vaccination against *Mycobacterium tuberculosis* infection (abbreviated as TB) in children as determined by **Interferon  $\gamma$  release assay** by quality of study ' $<5^*$ ' and ' $\geq 5^*$  rating', (D+L: DerSimonian and Laird method; M-H: Mantel-Haenszel method).

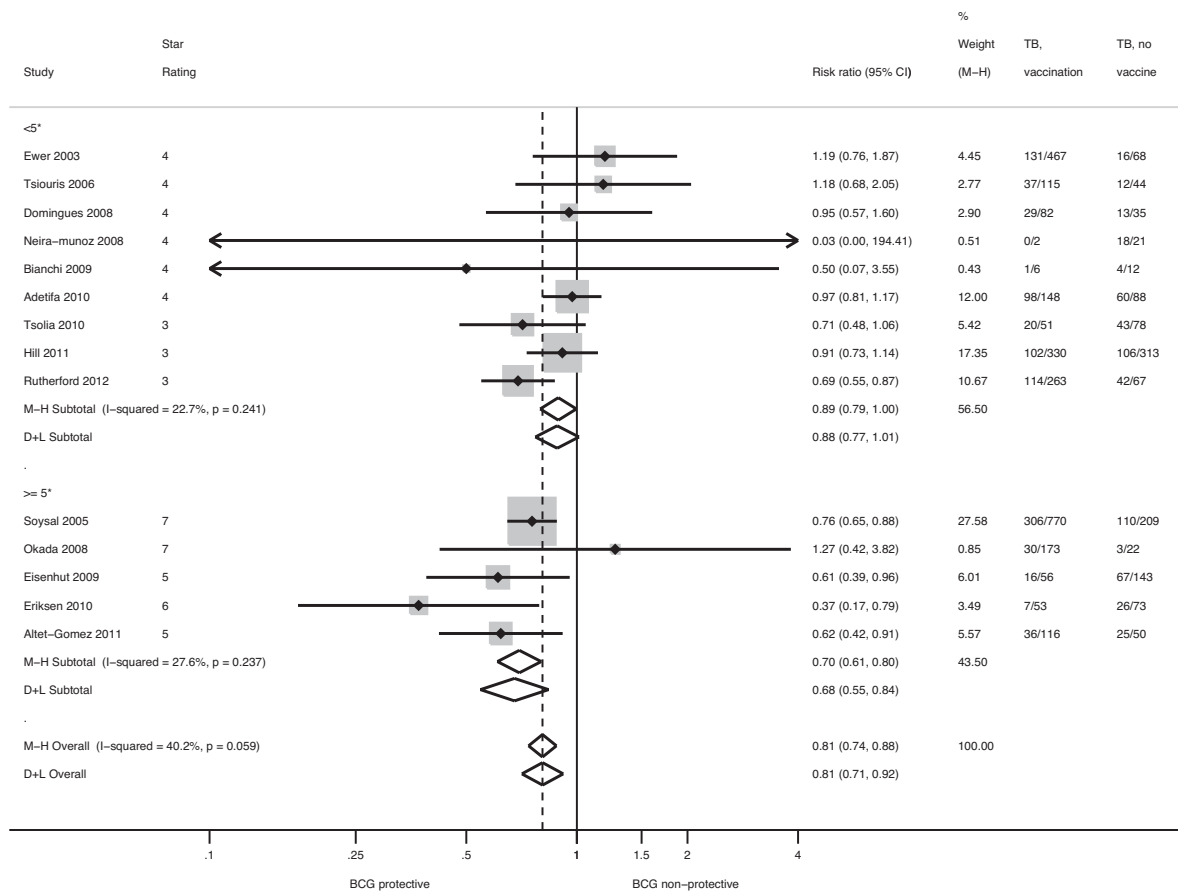

Supplement: roya016946.ww1_default.pdf [file roya016946.ww1_default.pdf]
